# Supplementary material for: Carbon Quantum Dots Bridged TiO2/CdIn2S4 toward Photocatalytic Upgrading of Polycyclic Aromatic Hydrocarbons to Benzaldehyde
Source: MDPI journal article supplement (doi:10.3390/molecules27217292), 2022-10-27
Supplement: s1 [file s1]

*Supporting Information*

**Carbon quantum dots bridged TiO<sub>2</sub>/CdIn<sub>2</sub>S<sub>4</sub> toward photocatalytic upgrading of polycyclic aromatic hydrocarbons to benzaldehyde**

Jiangwei Zhang<sup>12#</sup>, Fei Yu<sup>1#</sup>, Xi Ke<sup>3</sup>, He Yu<sup>1</sup>, Peiyuan Guo<sup>1</sup>, Lei Du<sup>2</sup>, Menglong Zhang<sup>1\*</sup> and Dongxiang Luo<sup>2\*</sup>

<sup>1</sup>Institute of hydrogen energy for carbon peaking and carbon neutralization, School of Semiconductor Science and Technology, South China Normal University, Foshan, 528225, P.R. China

<sup>2</sup>School of Chemistry and Chemical Engineering/Huangpu Hydrogen Innovation Center, Guangzhou University, Guangzhou 510006, PR China

<sup>3</sup>Great Bay Area Branch of Aerospace Information Research Institute, Chinese Academy of Sciences, Guangzhou 510530, China

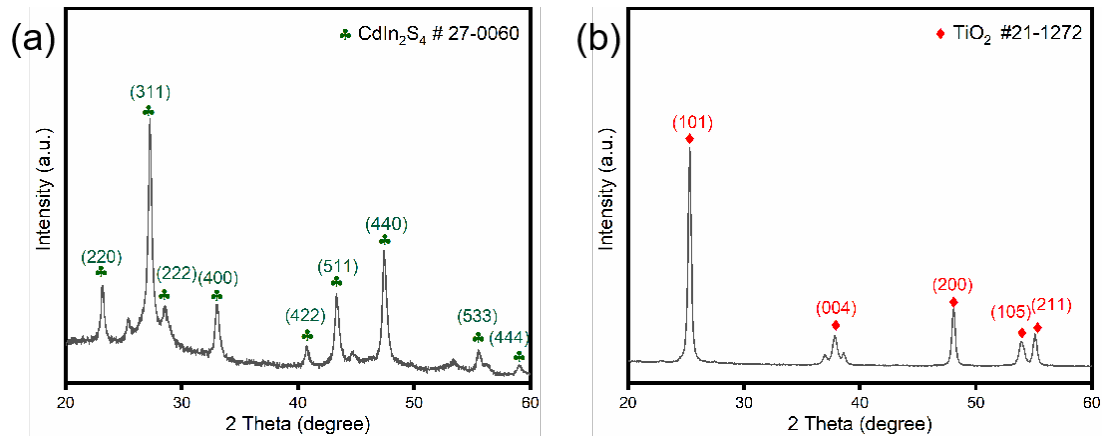

Figure S1: XRD of (a) bare CdIn<sub>2</sub>S<sub>4</sub> and (b) bare TiO<sub>2</sub>

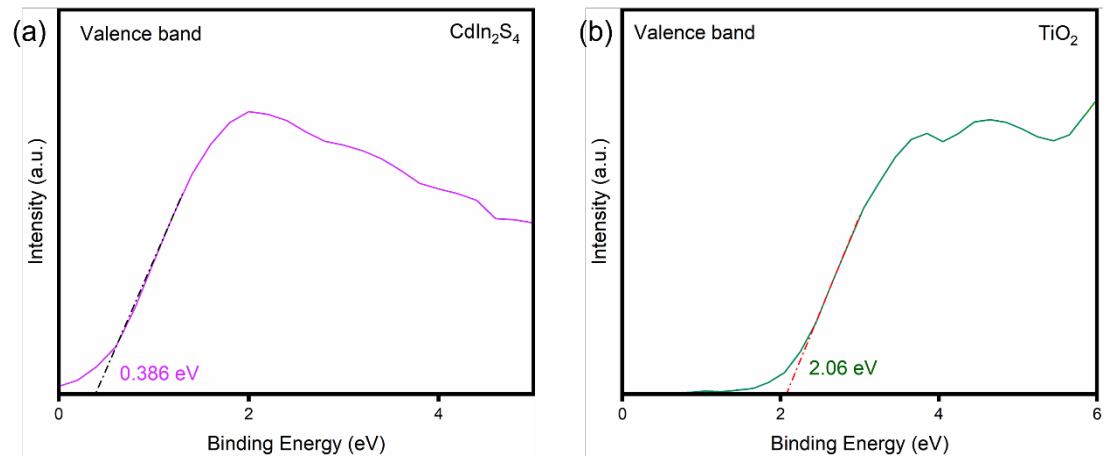

Figure S2: The valence band edges of (a) CdIn<sub>2</sub>S<sub>4</sub> and (b) TiO<sub>2</sub>.

After obtaining XPS valence band data, the following two formulas shall be used to convert the data into NHE[1] and RHE[2], respectively:

$$E_{VB,NHE} = \varphi + E_{VB,XPS} - 4.44 \quad (1)$$

$$E_{NHE} = E_{NHE} + 0.0591PH \quad (2)$$

where the  $\varphi$  represent work function of the instrument (4.2 eV).

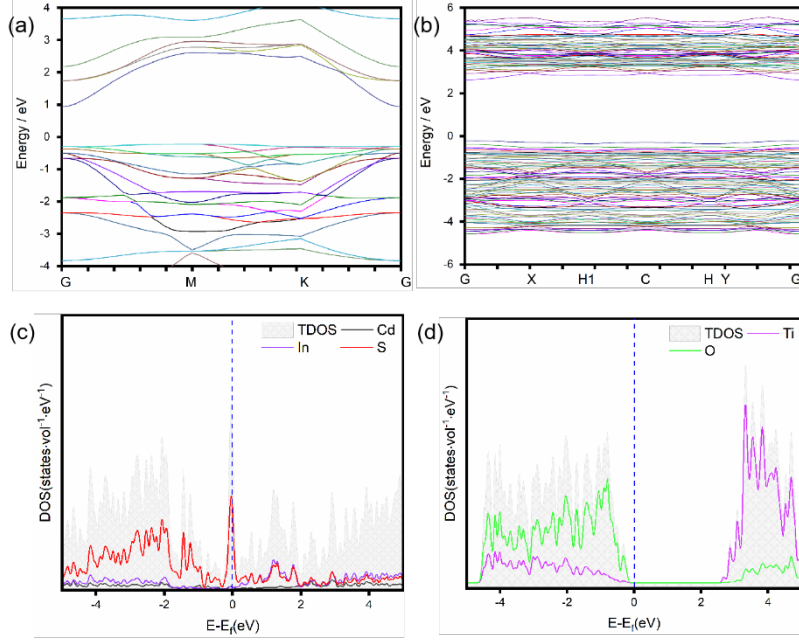

Figure S3: (a-b) the band structure of bare CdIn<sub>2</sub>S<sub>4</sub> bulk and bare TiO<sub>2</sub> bulk, (c-d) the density of states for bare CdIn<sub>2</sub>S<sub>4</sub> bulk and bare TiO<sub>2</sub> bulk

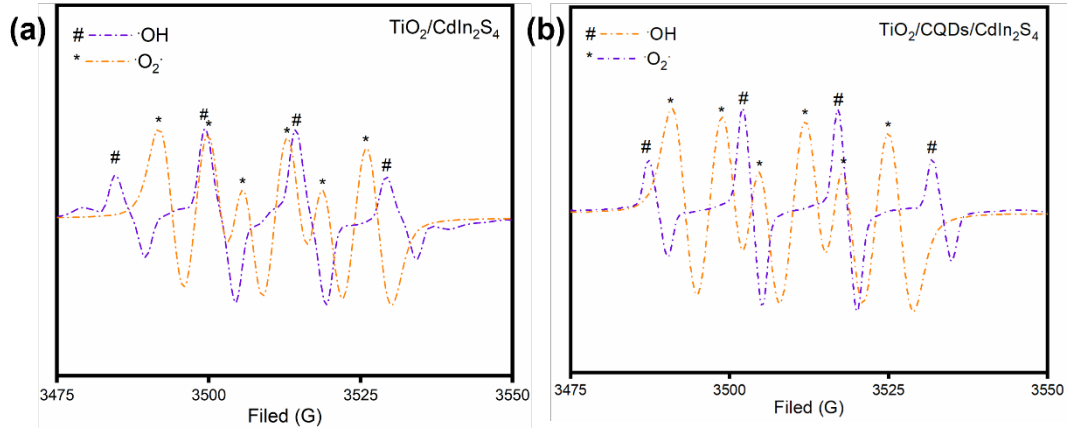

Figure S4: EPR spectrum of (a) TiO<sub>2</sub>/CdIn<sub>2</sub>S<sub>4</sub> and (b) TiO<sub>2</sub>/CQDs/CdIn<sub>2</sub>S<sub>4</sub>.

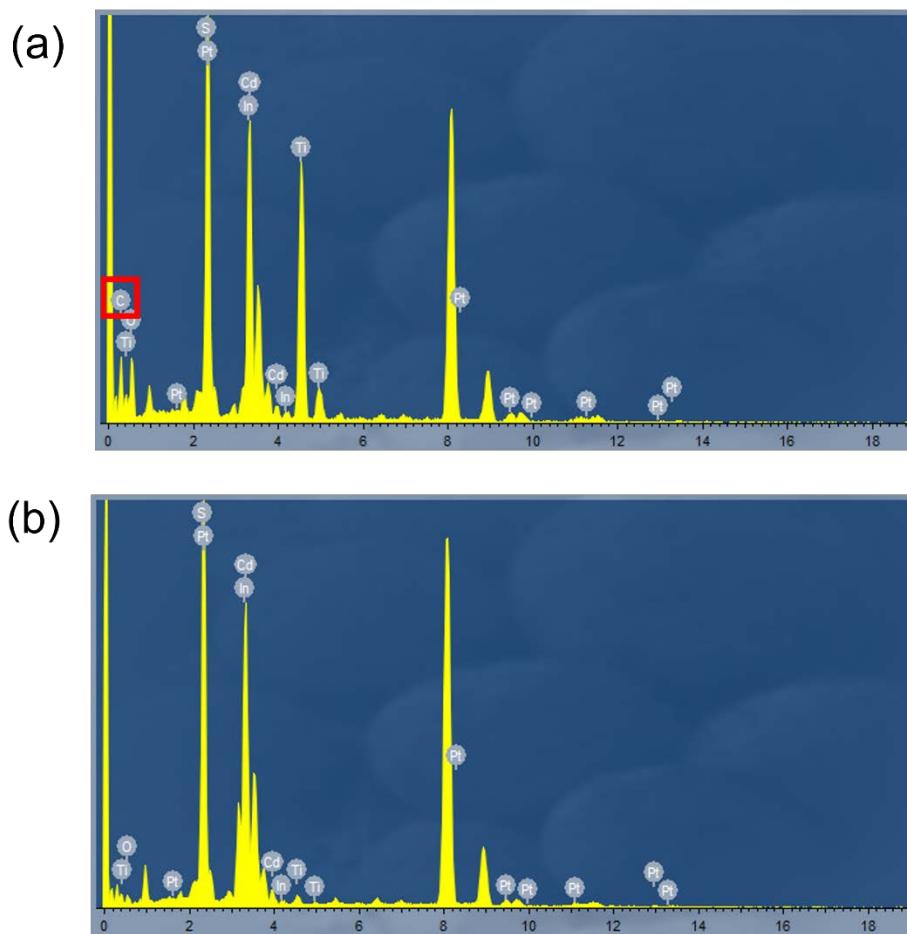

Figure S5: The elemental composition of (a)  $\text{TiO}_2/\text{CQDs}/\text{CdIn}_2\text{S}_4$  and (b)  $\text{TiO}_2/\text{CdIn}_2\text{S}_4$  analyzed by TEM-EDS.

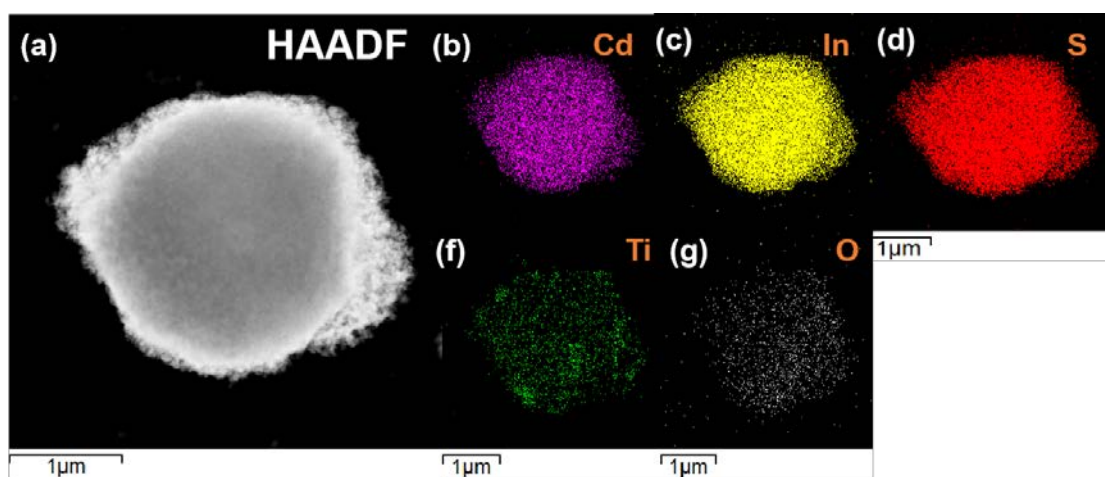

Figure S6: (a) HAADF TEM image of  $\text{TiO}_2/\text{CdIn}_2\text{S}_4$  heterostructure, (b-g) respective elemental mapping of Cd, In, S, Ti and O.

Table S1. Relative atomic content of TiO<sub>2</sub>/CQDs/CdIn<sub>2</sub>S<sub>4</sub> and TiO<sub>2</sub>/CdIn<sub>2</sub>S<sub>4</sub>.

| Sample                                                  | C/%   | Cd/%  | In/%  | S/%   | Ti/%  | O/%   | Pt/% |
|---------------------------------------------------------|-------|-------|-------|-------|-------|-------|------|
| TiO <sub>2</sub> /CQDs/CdIn <sub>2</sub> S <sub>4</sub> | 19.27 | 2.32  | 20.75 | 28.98 | 17.95 | 10.05 | 0.69 |
| TiO <sub>2</sub> /CdIn <sub>2</sub> S <sub>4</sub>      | 0     | 11.74 | 32.44 | 51.93 | 0.91  | 1.99  | 0.99 |

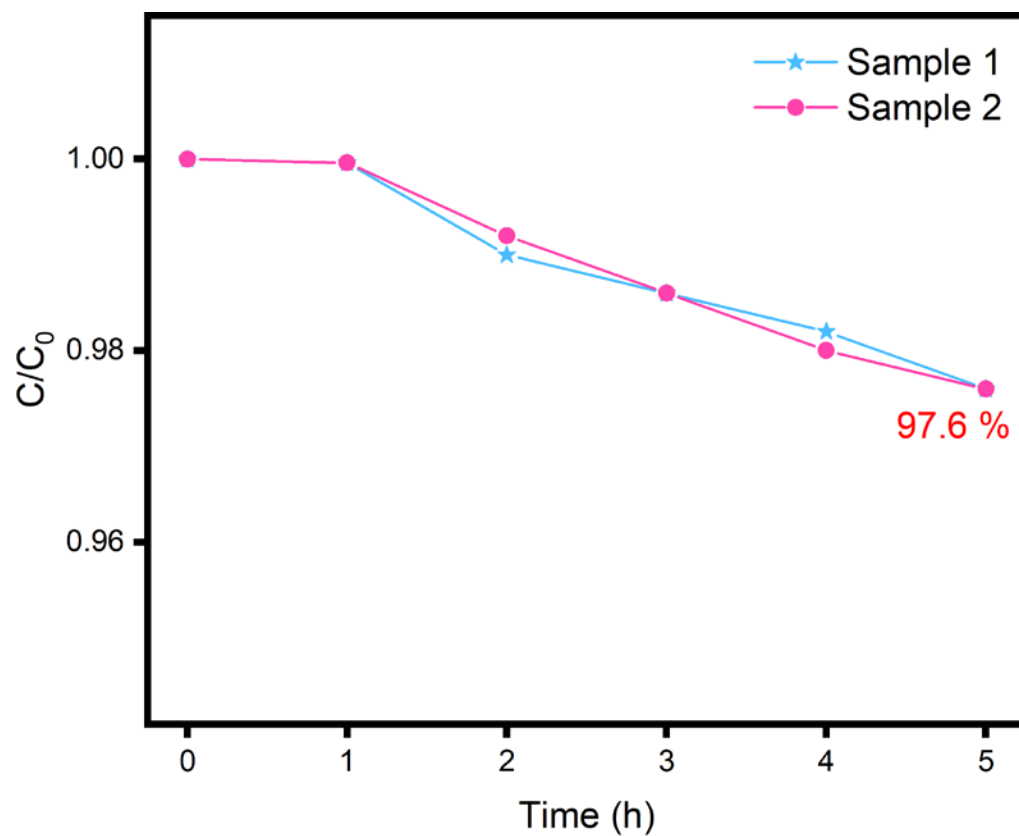

Figure S7: Stability of PAHs degradation of TiO<sub>2</sub>/CQDs/CdIn<sub>2</sub>S<sub>4</sub>.

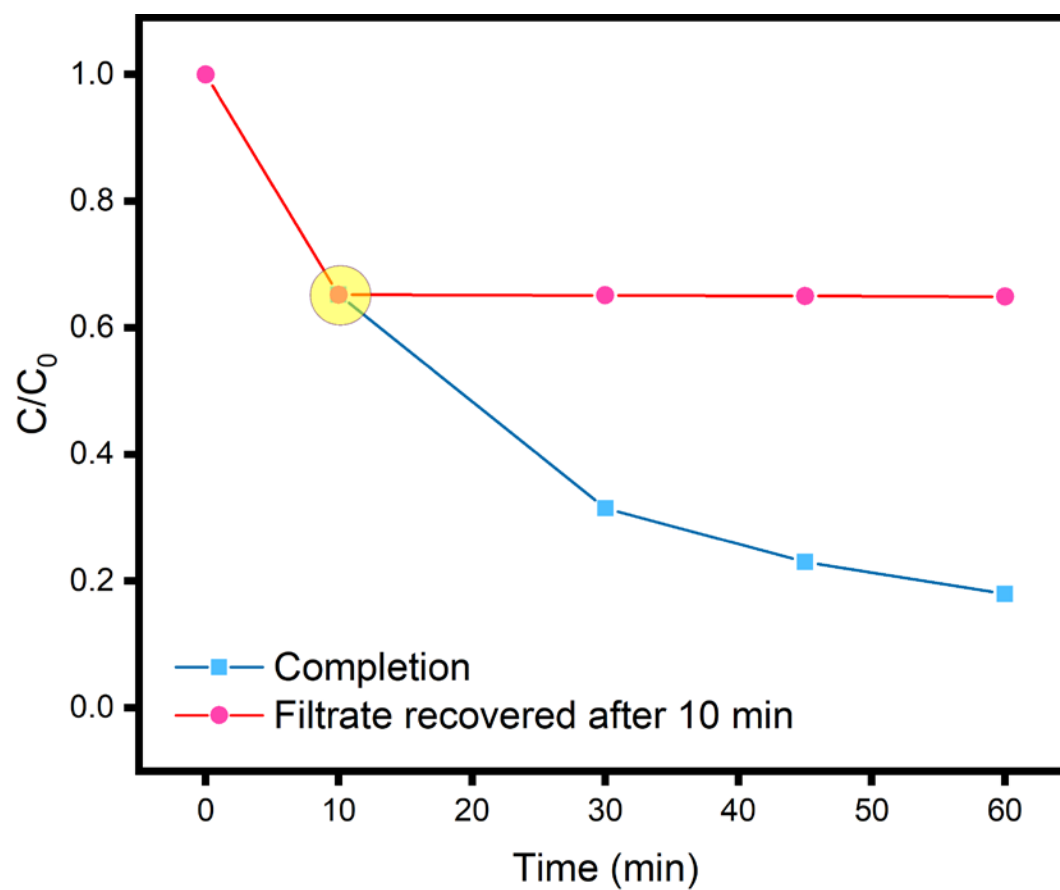

Figure S8: Hot filtration test of TiO<sub>2</sub>/CQDs/CdIn<sub>2</sub>S<sub>4</sub>.

1. Li, X.; Kang, B.; Dong, F.; Zhang, Z.; Luo, X.; Han, L.; Huang, J.; Feng, Z.; Chen, Z.; Xu, J.; et al. Enhanced photocatalytic degradation and H<sub>2</sub>/H<sub>2</sub>O<sub>2</sub> production performance of S-pCN/WO<sub>2.72</sub> S-scheme heterojunction with appropriate surface oxygen vacancies. *Nano Energy* **2021**, *81*, 105671, doi:10.1016/j.nanoen.2020.105671.
2. Li, Y.; Wang, K.; Huang, D.; Li, L.; Tao, J.; Ghany, N.A.A.; Jiang, F. Cd<sub>x</sub>Zn<sub>1-x</sub>S/Sb<sub>2</sub>Se<sub>3</sub> thin film photocathode for efficient solar water splitting. *Applied Catalysis B: Environmental* **2021**, *286*, doi:10.1016/j.apcatb.2020.119872.
